# Supplementary material for: R vs. S fluoroproline ring substitution: trans/cis effects on the formation of b2 ions in gas-phase peptide fragmentation
Source: Royal Society of Chemistry journal article supplement (doi:10.1039/c5cp05155j), 2015-12-22
Supplement: c5cp05155j1.pdf [file c5cp05155j1.pdf]

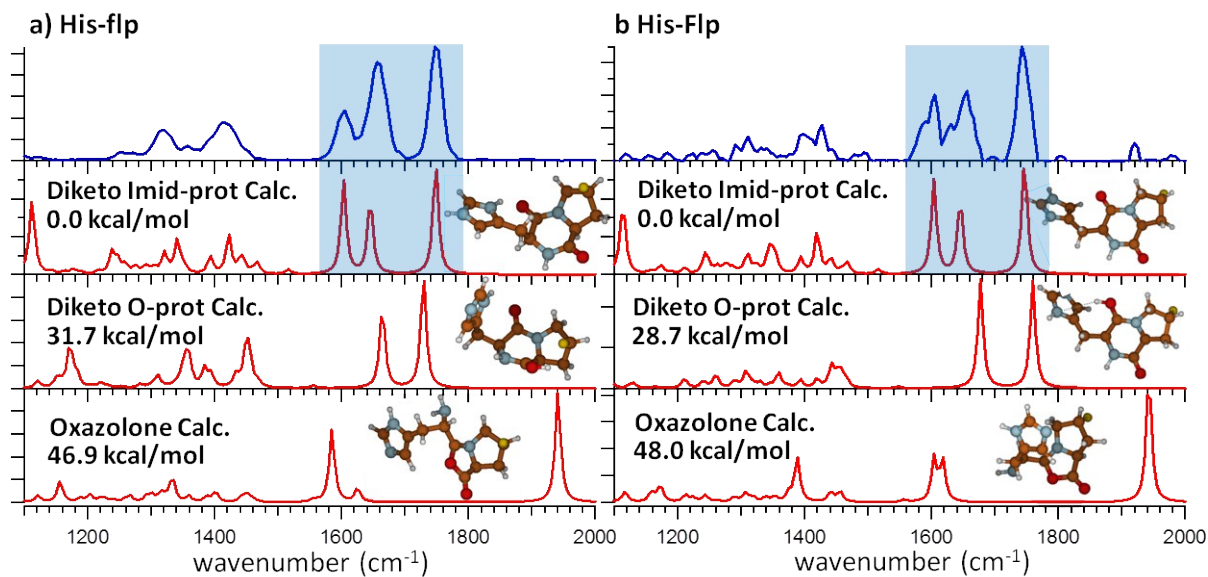

Figure S1: Experimental IR spectra (blue) of a) His-flp-Ala and b) His-Flp-Ala compared to the theoretical diketopiperazine and oxazolone structures (red) of each. The relative energies of each pair of calculated structures as well as ball and stick models of each structure are shown in the insets of each calculated spectrum. The major stretching regions for the imidazole protonated diketopiperazines of His-Flp and His-flp are highlighted in blue boxes for comparison to the experimental spectra.

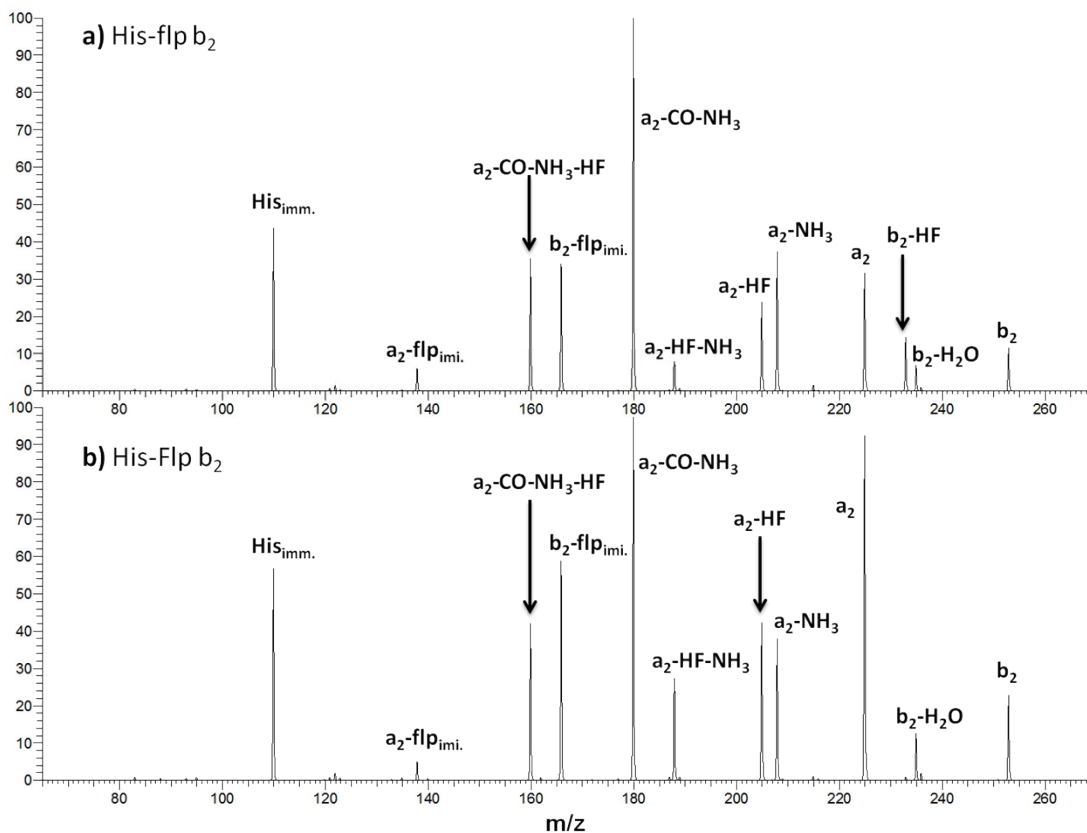

Figure S2: MS<sup>3</sup> of b<sub>2</sub> ions of **a)** His-flp-Ala and **b)** His-Flp-Ala performed on a Velos Pro linear ion trap. Precursor tripeptides were isolated at one m/z windows and fragmented at 20% CID collision energy followed by isolation and fragmentation of each b<sub>2</sub> at m/z 253 at the same isolation window and 30% CID collision energy. The -flp<sub>imi.</sub> and -Flp<sub>imi.</sub> labels indicate losses of the *S*-fluoroproline, and *R*-Fluoroproline imines while His<sub>imm.</sub> indicates the Histidine iminium ion.
